# Supplementary material for: Effect of the covid-19 pandemic in 2020 on life expectancy across populations in the USA and other high income countries: simulations of provisional mortality data
Source: PubMed Central journal article supplement — BMJ. 2021 Jun 24;373:n1343. doi: 10.1136/bmj.n1343 (PMC8220857; doi:10.1136/bmj.n1343), 2021-06-24

# Figure 1. Life expectancy at Birth in the United States, by Race-Ethnicity, and in Peer Countries; 2010–2018 and 2020

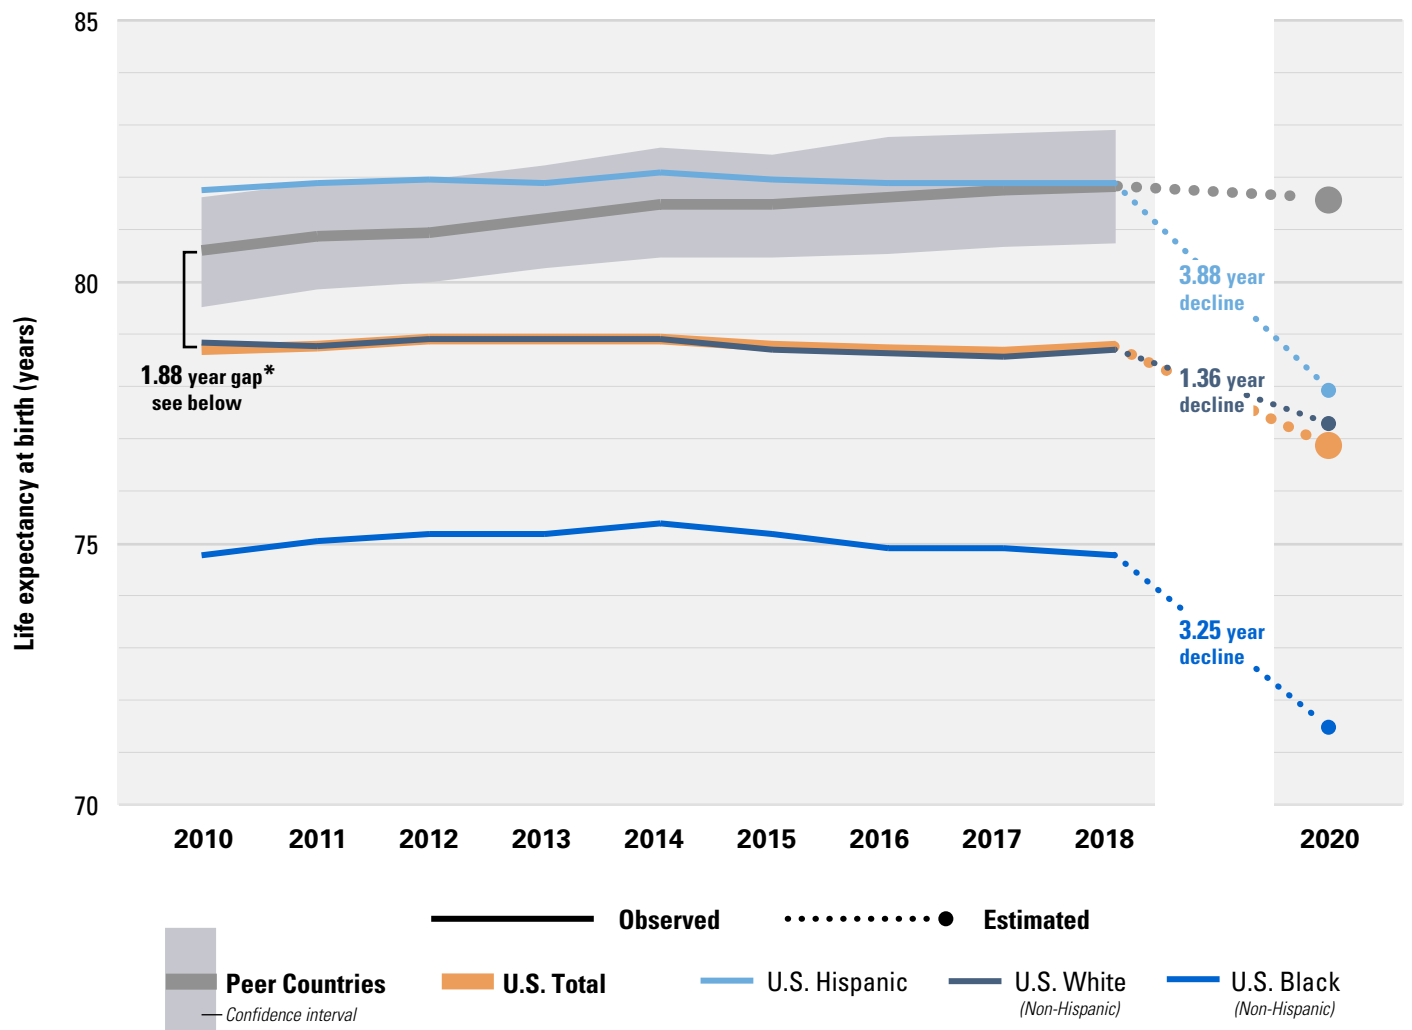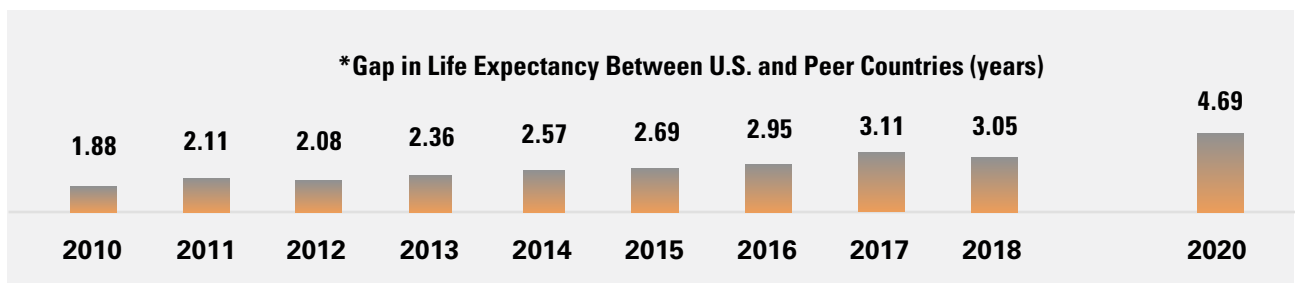

Supplement: woos065501.wf1.pdf [file woos065501.wf1.pdf]
