# Supplementary material for: Effect of the covid-19 pandemic in 2020 on life expectancy across populations in the USA and other high income countries: simulations of provisional mortality data
Source: PubMed Central journal article supplement — BMJ. 2021 Jun 24;373:n1343. doi: 10.1136/bmj.n1343 (PMC8220857; doi:10.1136/bmj.n1343), 2021-06-24

# Figure 2. Changes in Life Expectancy at Birth: U.S. Populations and Peer Country Average; 2010 to 2018, and 2018 to 2020

LEGEND | TIME PERIODS

2010 ← → 2018

2018 ← → 2020

For example, life expectancy for US females increased by **0.21 years** in 2010-2018 and then decreased by **1.50 years** in 2018-2020.

## FEMALES

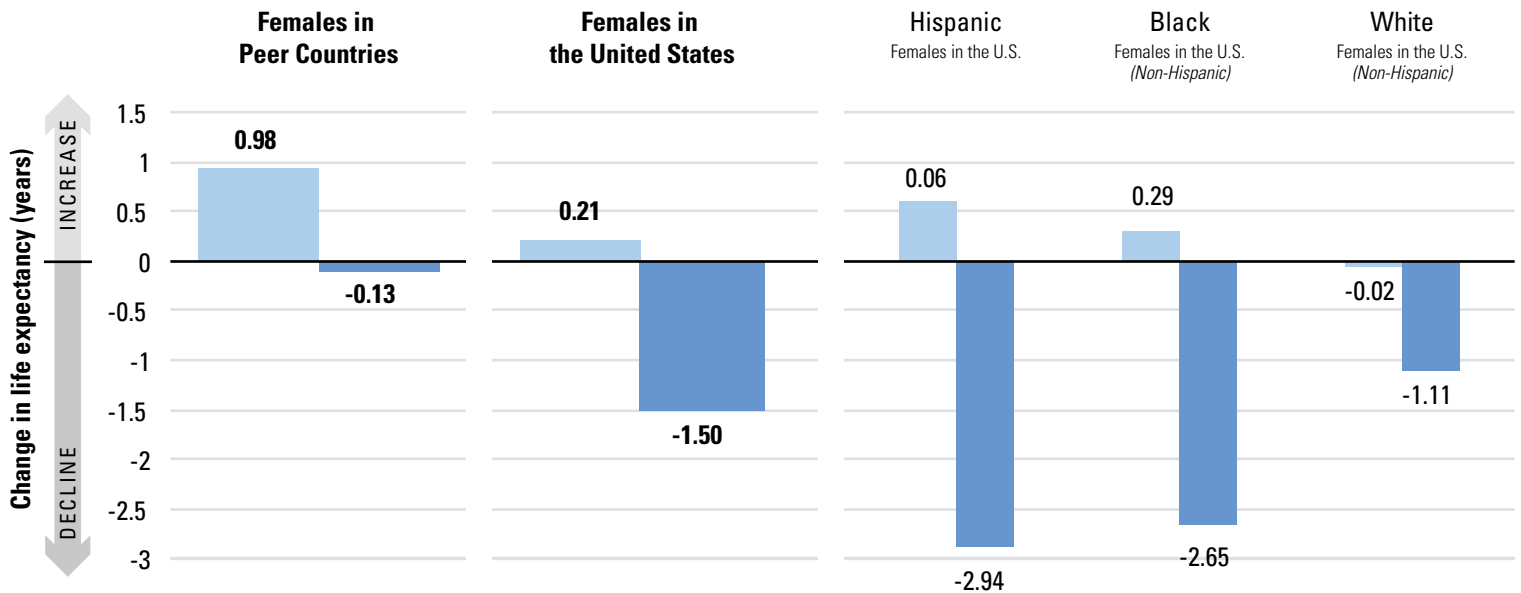

## MALES

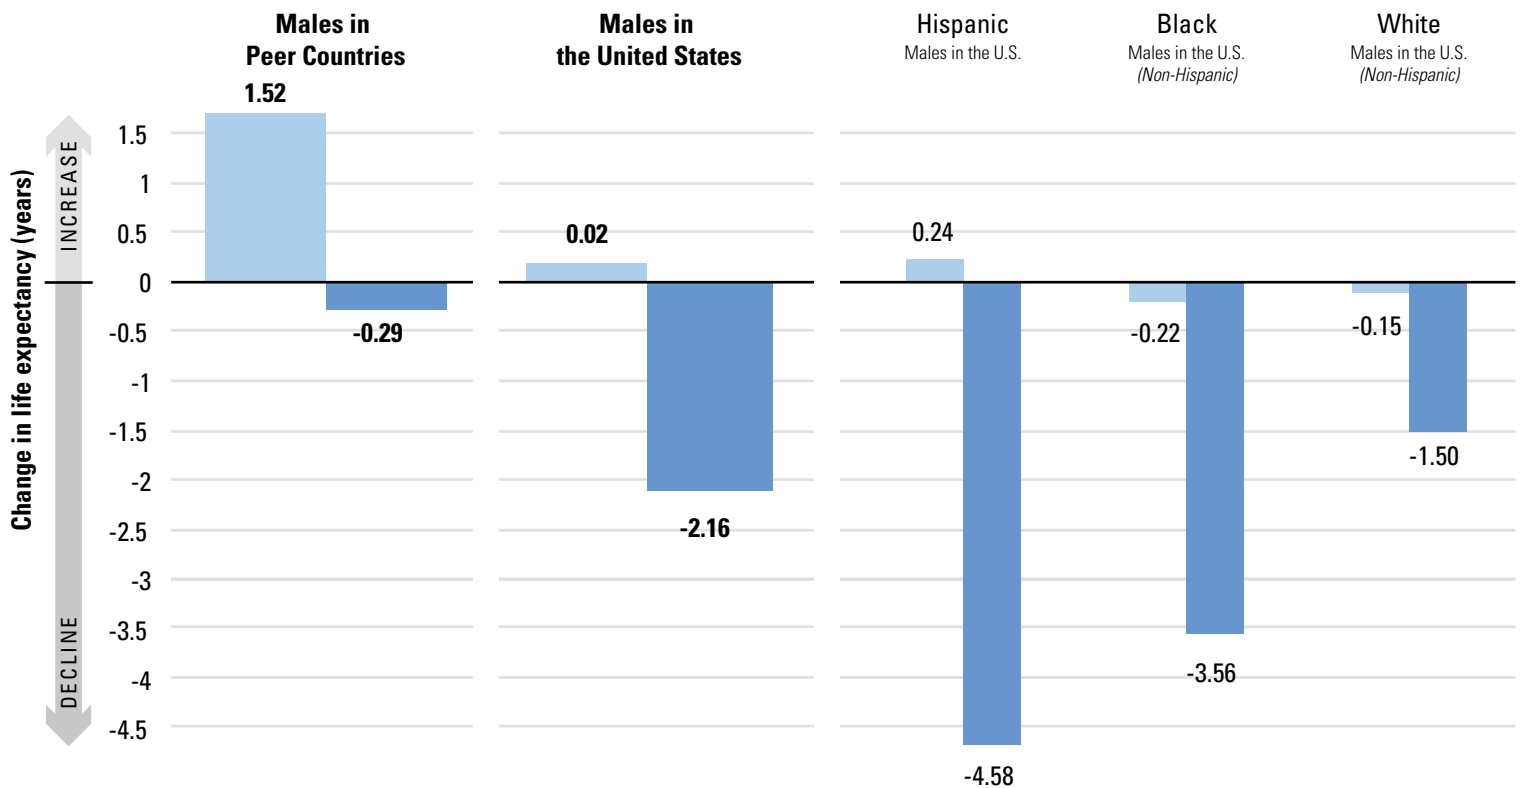

Supplement: woos065501.wf2.pdf [file woos065501.wf2.pdf]
