# Supplementary material for: Effect of the covid-19 pandemic in 2020 on life expectancy across populations in the USA and other high income countries: simulations of provisional mortality data
Source: PubMed Central journal article supplement — BMJ. 2021 Jun 24;373:n1343. doi: 10.1136/bmj.n1343 (PMC8220857; doi:10.1136/bmj.n1343), 2021-06-24
Supplement: woos065501.wf3.pdf [file woos065501.wf3.pdf]

# Figure 3. Increasing Gap in Life Expectancy Between the United States and Peer Country Average; 2010–2018 and 2018–2020

LEGEND | TIME PERIODS

2010 ← → 2018

2018 ← → 2020

For example, the gap between the life expectancy of US males and the average life expectancy of males in peer countries increased **1.50 years** in 2010-2018 and an additional **1.87 years** in 2018-2020.

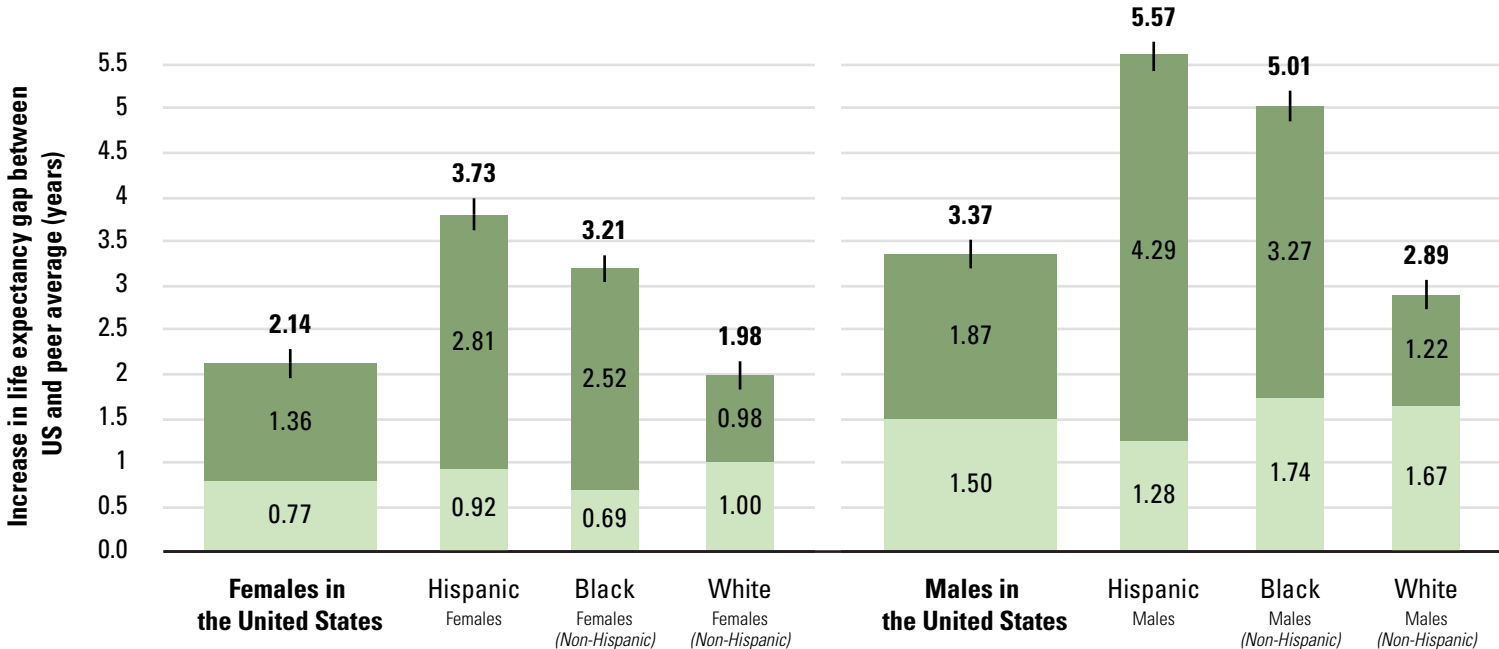

Data source: The BMJ.
